# Supplementary material for: Design of functionalized bridged 1,2,4-triazole N-oxides as high energy density materials and their comprehensive correlations
Source: Royal Society of Chemistry journal article supplement (doi:10.1039/d1ra05344b), 2021-01-01
Supplement: d1ra05344b1.pdf [file d1ra05344b1.pdf]

# Design on functionalized bridged 1,2,4-triazole N-Oxides as high energy density materials and their comprehensive correlations

Yue Liu,<sup>a</sup> Piao He,<sup>\*a</sup> Lishan Gong,<sup>a</sup> Xiufang Mo,<sup>a</sup> Jianguo Zhang<sup>b</sup>

## Table of Contents

1. Optimized parameters
2. HOMO-LUMO orbitals and energy gap
3. Molecular electrostatic potential(ESP)
4. Thermodynamic parameters
5. Detonation parameters
6. Sensitivity parameters
7. References

### 1. Optimized parameters

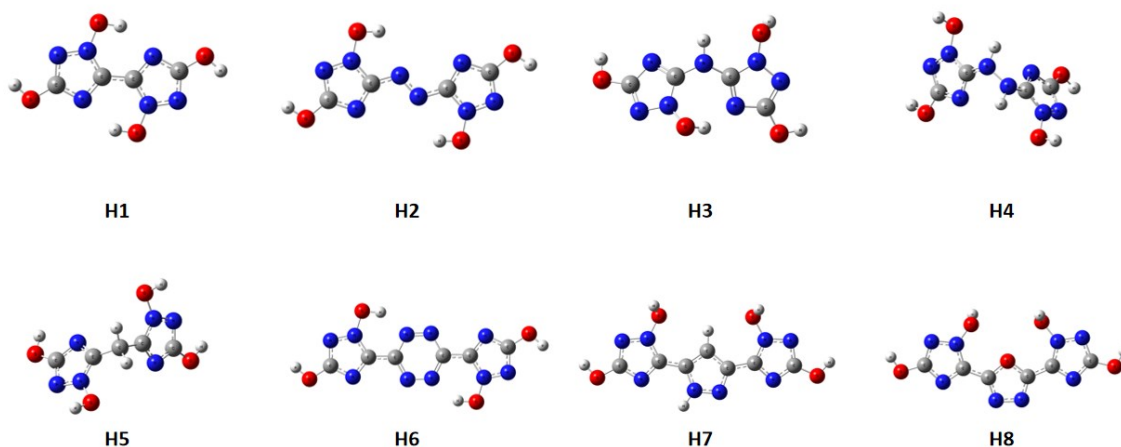

Figure S1 Optimized geometry of **H** series

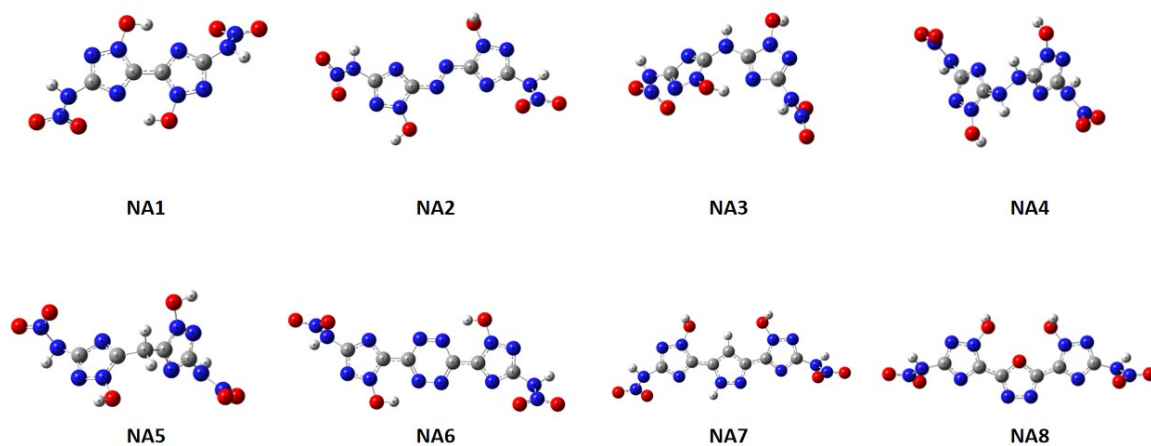

**Figure S2** Optimized geometry of NA series

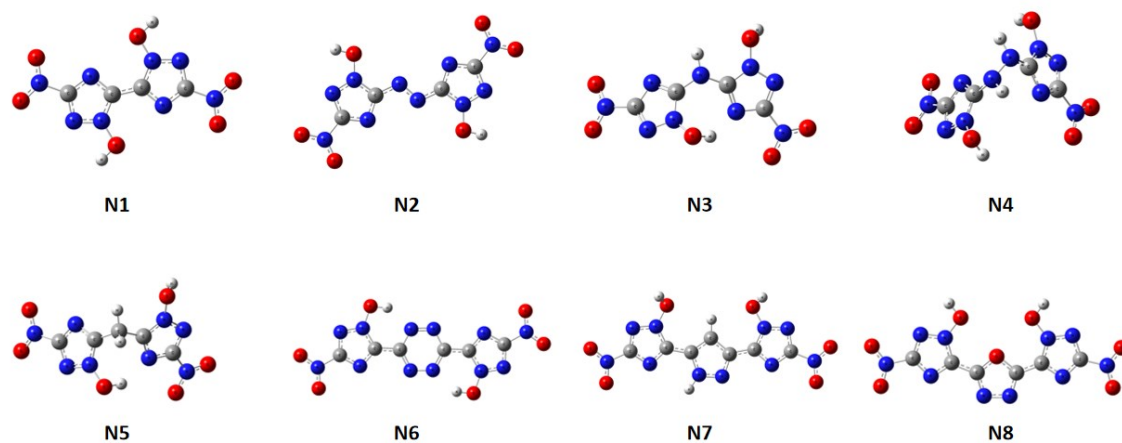

**Figure S3** Optimized geometry of N series

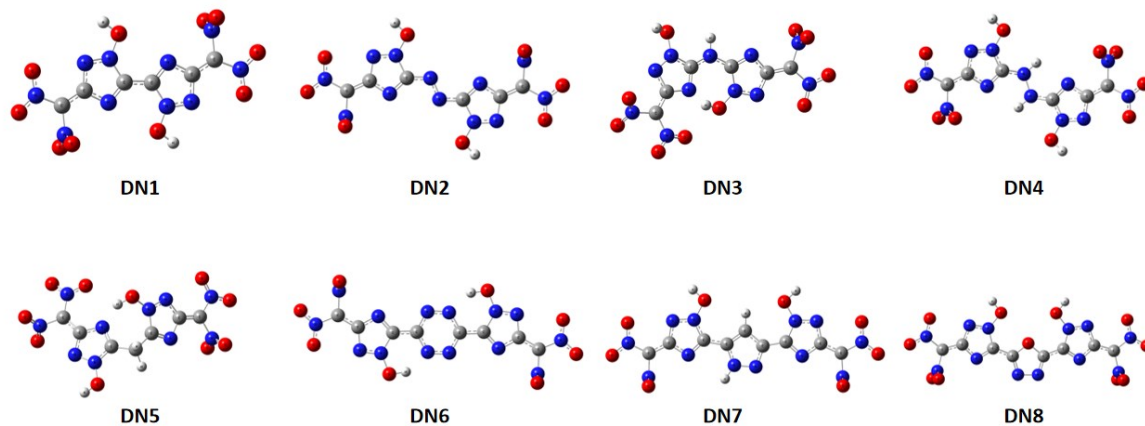

**Figure S4** Optimized geometry of DN series

## 2. HOMO-LUMO orbitals and energy gap

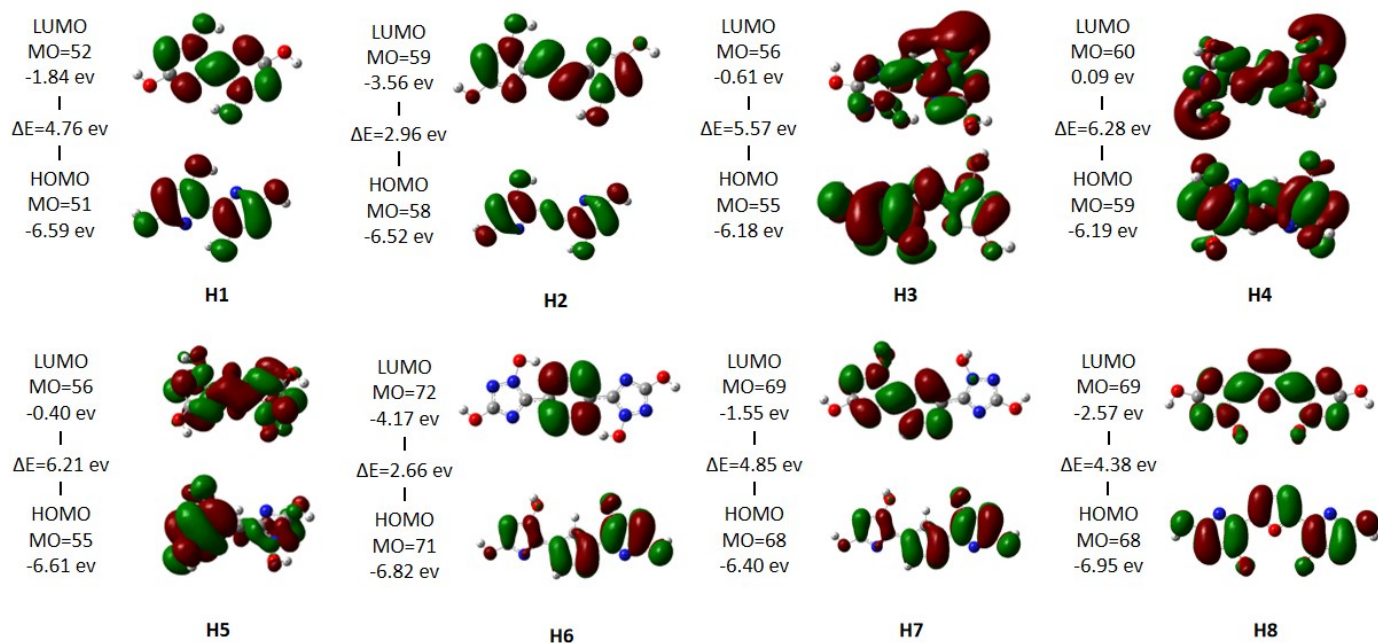

Figure S5 HOMO-LUMO energy and HOMO-LUMO gap of H series

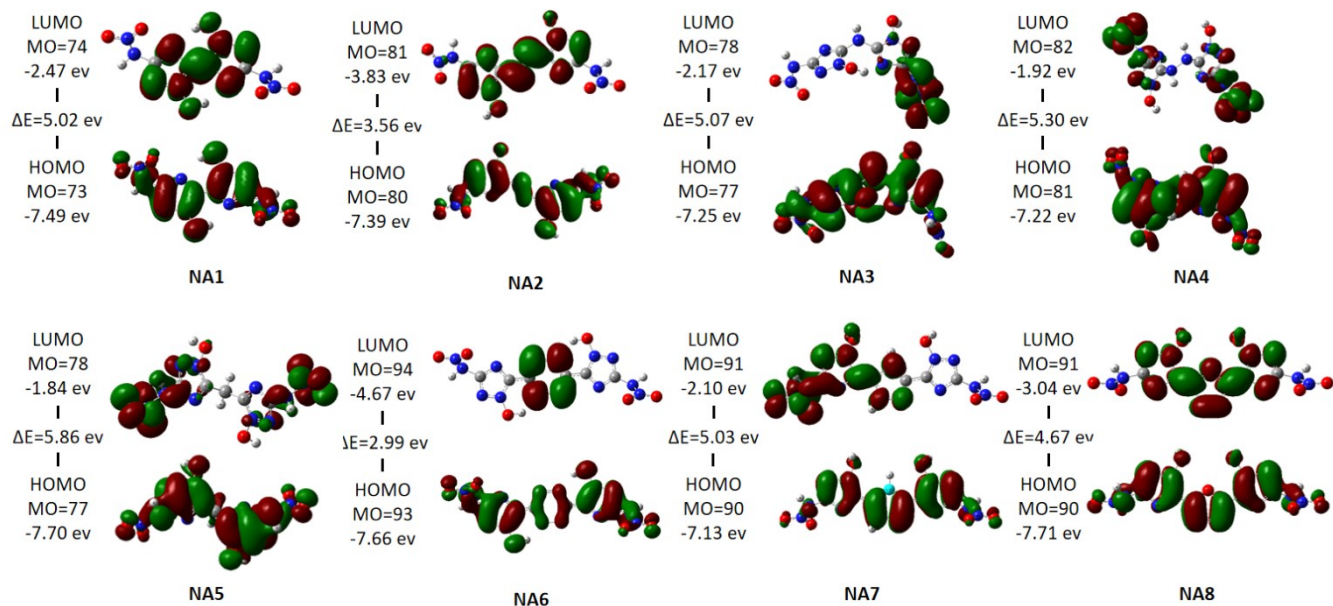

Figure S6 HOMO-LUMO energy and HOMO-LUMO gap of NA series

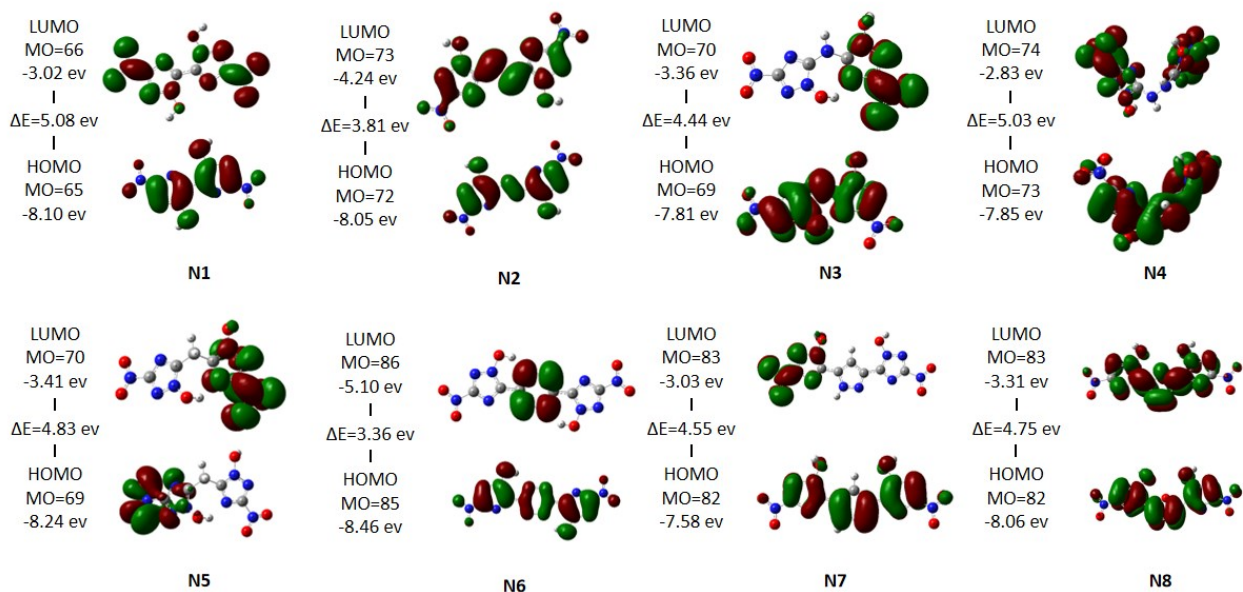

Figure S7 HOMO-LUMO energy and HOMO-LUMO gap of N series

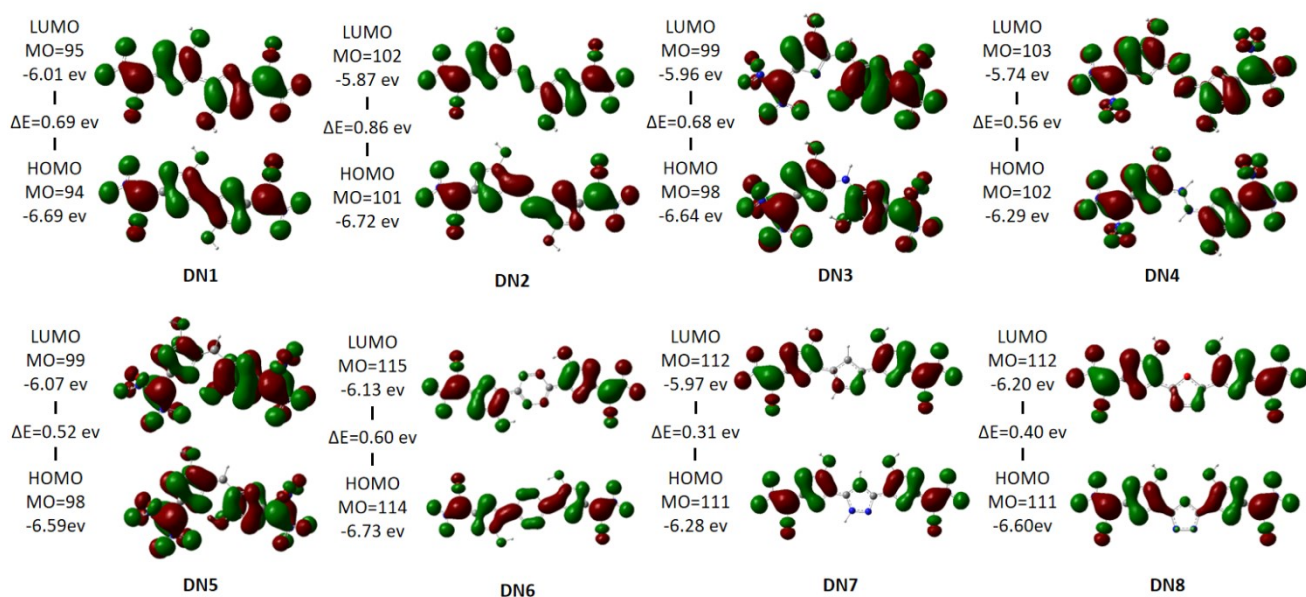

Figure S8 HOMO-LUMO energy and HOMO-LUMO gap of DN series



### 3. Molecular electrostatic potential (ESP)

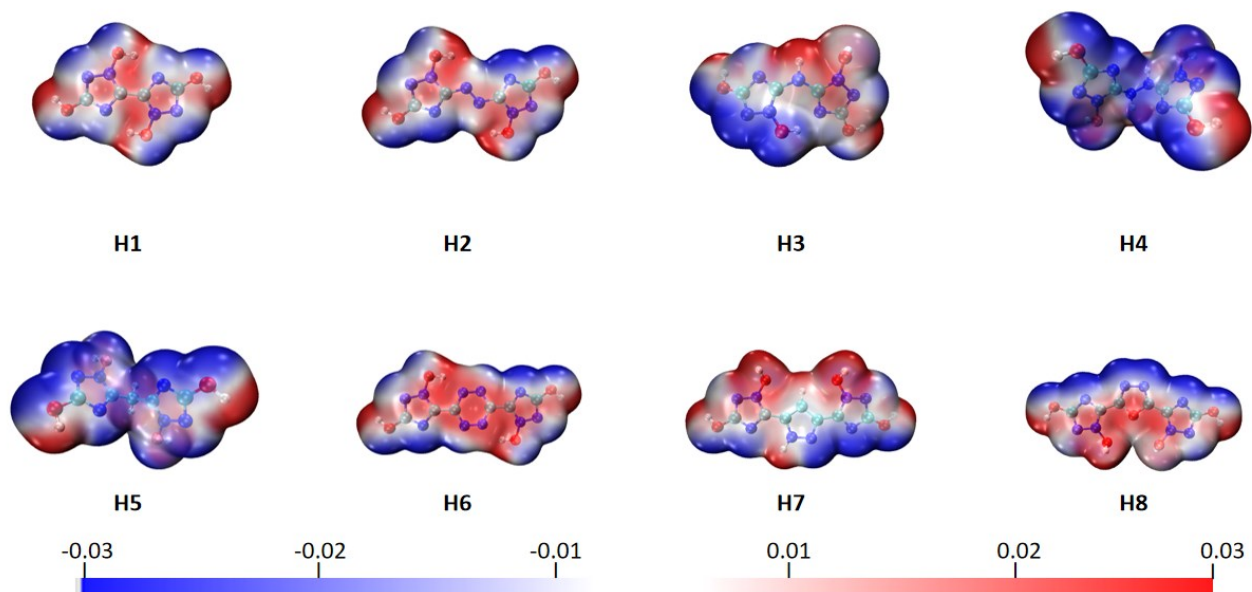

**Figure S9** Molecular electrostatic potential of  $-\text{OH}(\text{H})$  series ranging from  $-0.03$  a.u.(blue) to  $0.03$  a.u.(red),  
isosurface=0.001

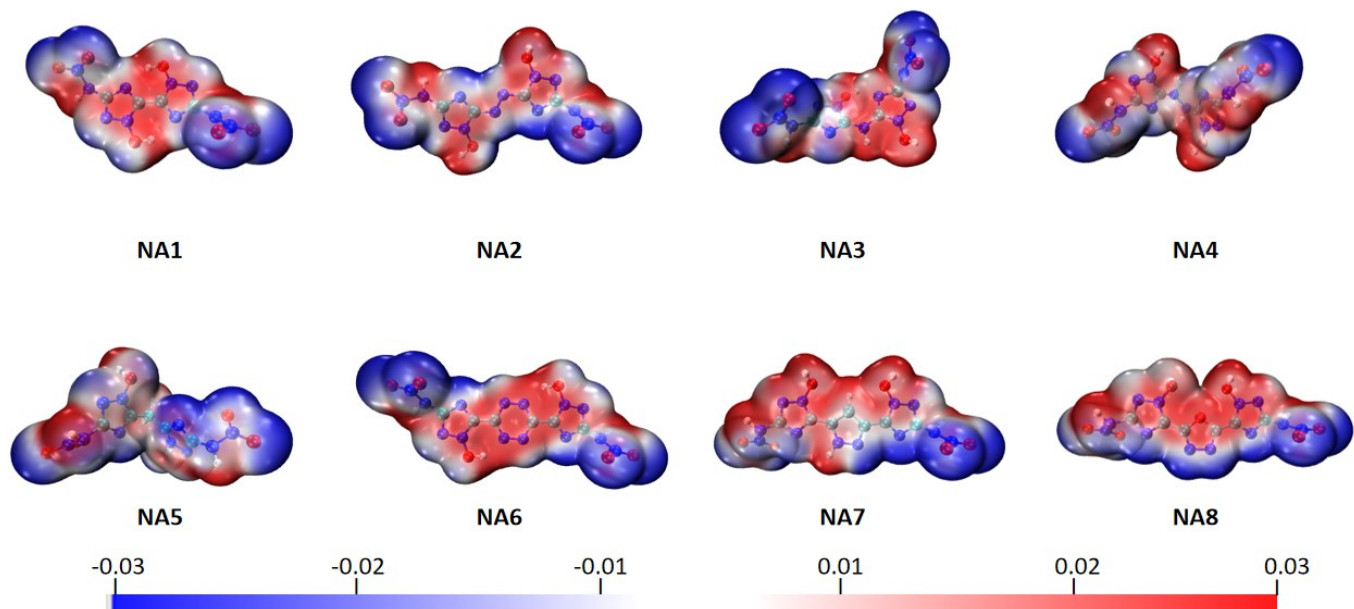

**Figure S10** Molecular electrostatic potential of  $-\text{NHNO}_2(\text{NA})$  series ranging from  $-0.03$  a.u.(blue) to  $0.03$  a.u.(red),  
isosurface=0.001

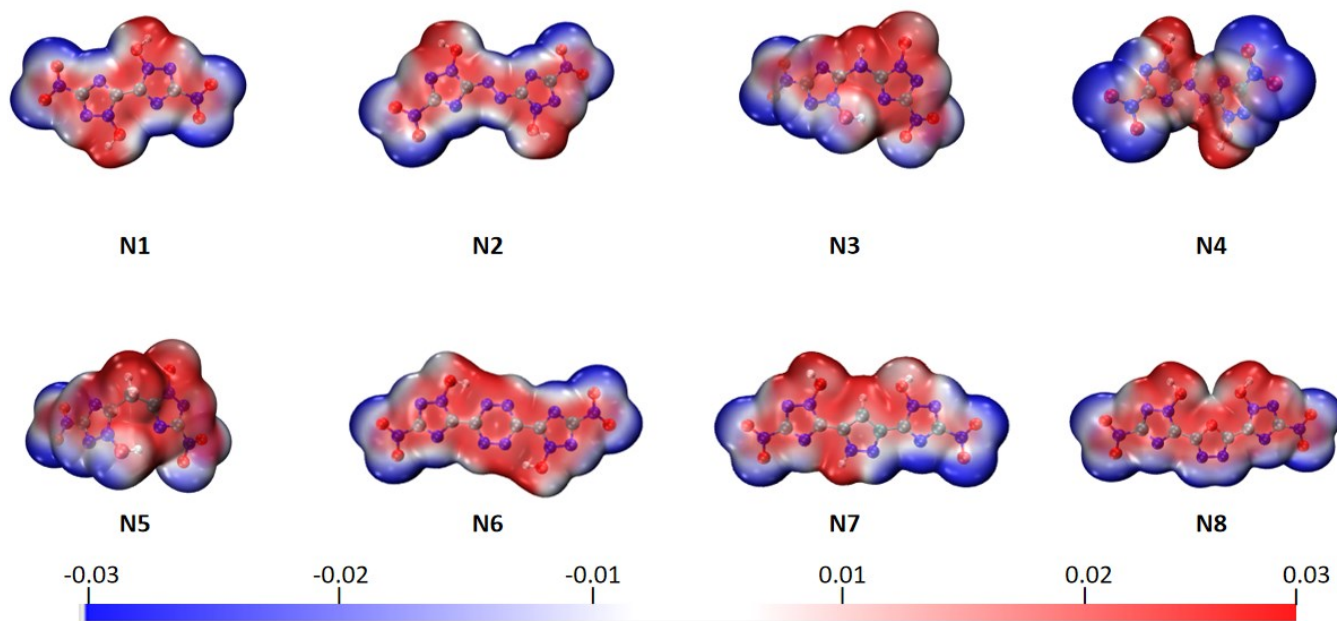

**Figure S11** Molecular electrostatic potential of  $-\text{NO}_2(\mathbf{N})$  series ranging from  $-0.03$  a.u.(blue) to  $0.03$  a.u.(red),  
 isosurface= $0.001$

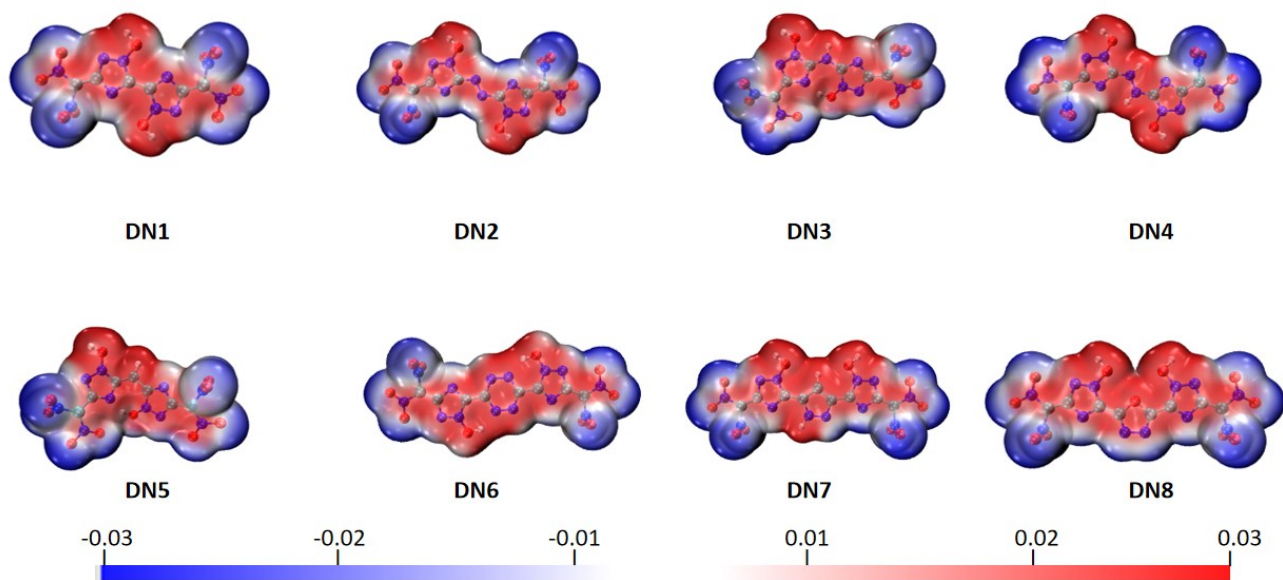

**Figure S12** Molecular electrostatic potential of  $-\text{C}(\text{NO}_2)_2$  ( $\mathbf{DN}$ ) series ranging from  $-0.03$  a.u.(blue) to  $0.03$   
 a.u.(red), isosurface= $0.001$

#### 4. Thermodynamic parameters

**Table. S1** 40 substituted 1,2,4-triazole-N-oxides, their sum of electronic and zero-point energy  $E_0$ , thermal correction from 0K to 298K  $H_T$ , gas-phase heat of formation under 0K  $HOF(g,0K)$ , gas-phase heat of formation under 298K  $HOF(g,298K)$ , condensed-phase heat of formation under 298K  $HOF(c,298K)$ , compared with HMX and RDX.

| No. | Formula                                                       | $E_0$<br>(a.u.)<br>6-311G(d,p) | $H_T$<br>(a.u.) | $HOF_{(g,0K)}$<br>(kJ/mol) | $HOF_{(g,298K)}$<br>(kJ/mol) | $HOF_{(c,298K)}$<br>(kJ/mol) |
|-----|---------------------------------------------------------------|--------------------------------|-----------------|----------------------------|------------------------------|------------------------------|
| H1  | C <sub>4</sub> H <sub>4</sub> N <sub>6</sub> O <sub>4</sub>   | -784.186546                    | 0.012266        | 114.00                     | 81.67                        | -10.85                       |
| H2  | C <sub>4</sub> H <sub>4</sub> N <sub>8</sub> O <sub>4</sub>   | -893.63995                     | 0.014198        | 382.43                     | 346.47                       | 231.81                       |
| H3  | C <sub>4</sub> H <sub>5</sub> N <sub>7</sub> O <sub>4</sub>   | -839.534881                    | 0.0137          | 150.64                     | 113.50                       | -13.34                       |
| H4  | C <sub>4</sub> H <sub>6</sub> N <sub>8</sub> O <sub>4</sub>   | -894.844054                    | 0.015413        | 290.01                     | 248.80                       | 121.70                       |
| H5  | C <sub>5</sub> H <sub>6</sub> N <sub>6</sub> O <sub>4</sub>   | -823.47276                     | 0.014428        | 138.98                     | 102.83                       | -19.28                       |
| H6  | C <sub>6</sub> H <sub>4</sub> N <sub>10</sub> O <sub>4</sub>  | -1079.344129                   | 0.016442        | 658.64                     | 617.79                       | 483.13                       |
| H7  | C <sub>7</sub> H <sub>6</sub> N <sub>8</sub> O <sub>4</sub>   | -1009.193377                   | 0.017011        | 372.07                     | 331.92                       | 178.32                       |
| H8  | C <sub>6</sub> H <sub>4</sub> N <sub>8</sub> O <sub>4</sub>   | -1045.103403                   | 0.016888        | 302.90                     | 267.57                       | 114.59                       |
| N1  | C <sub>4</sub> H <sub>2</sub> N <sub>8</sub> O <sub>6</sub>   | -1042.76136                    | 0.016269        | 562.13                     | 531.36                       | 411.08                       |
| N2  | C <sub>4</sub> H <sub>2</sub> N <sub>10</sub> O <sub>6</sub>  | -1152.22184                    | 0.01802         | 812.00                     | 777.13                       | 637.67                       |
| N3  | C <sub>4</sub> H <sub>3</sub> N <sub>9</sub> O <sub>6</sub>   | -1098.126597                   | 0.016645        | 554.44                     | 516.08                       | 382.73                       |
| N4  | C <sub>4</sub> H <sub>4</sub> N <sub>10</sub> O <sub>6</sub>  | -1153.441191                   | 0.017357        | 679.58                     | 634.53                       | 491.82                       |
| N5  | C <sub>5</sub> H <sub>4</sub> N <sub>8</sub> O <sub>6</sub>   | -1082.075687                   | 0.016749        | 513.36                     | 474.37                       | 337.71                       |
| N6  | C <sub>6</sub> H <sub>2</sub> N <sub>12</sub> O <sub>6</sub>  | -1337.930249                   | 0.019493        | 1077.11                    | 1035.32                      | 879.05                       |
| N7  | C <sub>7</sub> H <sub>4</sub> N <sub>10</sub> O <sub>6</sub>  | -1267.786886                   | 0.020321        | 771.16                     | 730.75                       | 566.41                       |
| N8  | C <sub>6</sub> H <sub>2</sub> N <sub>10</sub> O <sub>7</sub>  | -1303.691041                   | 0.020098        | 717.39                     | 681.54                       | 524.52                       |
| NA1 | C <sub>4</sub> H <sub>4</sub> N <sub>10</sub> O <sub>6</sub>  | -1153.467918                   | 0.017677        | 609.47                     | 565.26                       | 439.04                       |
| NA2 | C <sub>4</sub> H <sub>4</sub> N <sub>12</sub> O <sub>6</sub>  | -1262.915519                   | 0.020509        | 893.13                     | 847.66                       | 687.56                       |
| NA3 | C <sub>4</sub> H <sub>5</sub> N <sub>11</sub> O <sub>6</sub>  | -1208.816801                   | 0.019002        | 644.68                     | 595.38                       | 445.89                       |
| NA4 | C <sub>4</sub> H <sub>6</sub> N <sub>12</sub> O <sub>6</sub>  | -1264.130669                   | 0.019748        | 771.73                     | 715.82                       | 556.03                       |
| NA5 | C <sub>5</sub> H <sub>6</sub> N <sub>10</sub> O <sub>6</sub>  | -1192.756957                   | 0.019741        | 627.04                     | 578.76                       | 420.07                       |
| NA6 | C <sub>6</sub> H <sub>4</sub> N <sub>14</sub> O <sub>6</sub>  | -1448.624693                   | 0.021842        | 1156.23                    | 1103.48                      | 927.41                       |
| NA7 | C <sub>7</sub> H <sub>6</sub> N <sub>12</sub> O <sub>6</sub>  | -1378.476562                   | 0.022494        | 862.79                     | 810.95                       | 619.67                       |
| NA8 | C <sub>6</sub> H <sub>4</sub> N <sub>12</sub> O <sub>7</sub>  | -1414.383975                   | 0.022322        | 800.47                     | 753.32                       | 568.33                       |
| DN1 | C <sub>6</sub> H <sub>2</sub> N <sub>10</sub> O <sub>10</sub> | -1529.131261                   | 0.02381         | 974.33                     | 935.18                       | 766.37                       |
| DN2 | C <sub>6</sub> H <sub>2</sub> N <sub>12</sub> O <sub>10</sub> | -1638.598307                   | 0.025372        | 1206.98                    | 1163.24                      | 973.13                       |
| DN3 | C <sub>6</sub> H <sub>3</sub> N <sub>11</sub> O <sub>10</sub> | -1584.50177                    | 0.024527        | 952.81                     | 906.98                       | 723.89                       |
| DN4 | C <sub>6</sub> H <sub>4</sub> N <sub>12</sub> O <sub>10</sub> | -1639.80613                    | 0.027181        | 1104.80                    | 1057.37                      | 858.16                       |
| DN5 | C <sub>7</sub> H <sub>4</sub> N <sub>10</sub> O <sub>10</sub> | -1568.442715                   | 0.024683        | 933.10                     | 886.76                       | 702.92                       |
| DN6 | C <sub>8</sub> H <sub>2</sub> N <sub>14</sub> O <sub>10</sub> | -1824.298284                   | 0.027391        | 1494.20                    | 1444.98                      | 1229.32                      |
| DN7 | C <sub>9</sub> H <sub>4</sub> N <sub>12</sub> O <sub>10</sub> | -1754.14919                    | 0.02805         | 1203.29                    | 1155.00                      | 935.98                       |
| DN8 | C <sub>8</sub> H <sub>2</sub> N <sub>12</sub> O <sub>11</sub> | -1790.052601                   | 0.027729        | 1151.47                    | 1107.48                      | 895.90                       |
| TN1 | C <sub>4</sub> H <sub>2</sub> N <sub>8</sub> O <sub>6</sub>   | -1939.48026                    | 0.029936        | 775.80                     | 726.66                       | 539.40                       |
| TN2 | C <sub>4</sub> H <sub>2</sub> N <sub>10</sub> O <sub>6</sub>  | -2048.940483                   | 0.031612        | 1026.35                    | 972.91                       | 755.12                       |

|     |                                                              |              |          |         |         |                     |
|-----|--------------------------------------------------------------|--------------|----------|---------|---------|---------------------|
| TN3 | C <sub>4</sub> H <sub>3</sub> N <sub>9</sub> O <sub>6</sub>  | -1994.845461 | 0.030242 | 768.21  | 711.30  | 507.69              |
| TN4 | C <sub>4</sub> H <sub>4</sub> N <sub>10</sub> O <sub>6</sub> | -2050.163156 | 0.031347 | 885.22  | 822.64  | 608.92              |
| TN5 | C <sub>5</sub> H <sub>4</sub> N <sub>8</sub> O <sub>6</sub>  | -1978.795106 | 0.030288 | 725.68  | 667.97  | 457.31              |
| TN6 | C <sub>6</sub> H <sub>2</sub> N <sub>12</sub> O <sub>6</sub> | -2234.64977  | 0.033061 | 1289.16 | 1228.74 | 986.40              |
| TN7 | C <sub>7</sub> H <sub>4</sub> N <sub>10</sub> O <sub>6</sub> | -2164.50662  | 0.03365  | 982.65  | 922.98  | 670.35              |
| TN8 | C <sub>6</sub> H <sub>2</sub> N <sub>10</sub> O <sub>7</sub> | -2200.411179 | 0.033772 | 927.82  | 873.61  | 624.83              |
| RDX | C <sub>3</sub> H <sub>6</sub> N <sub>6</sub> O <sub>6</sub>  | ---          | ---      | ---     | 192.00  | 79.00 <sup>1</sup>  |
| HMX | C <sub>4</sub> H <sub>8</sub> N <sub>8</sub> O <sub>8</sub>  | ---          | ---      | ---     | ---     | 102.41 <sup>1</sup> |

## 5. Detonation parameters

**Table. S2** 40 substituted 1,2,4-triazole derivatives, their predicted values of density  $\rho$ , oxygen balance  $OB$ , detonation energy  $Q$ , detonation velocity  $D$ , detonation pressure  $P$ , and  $\Delta V_{\text{Triazol}}$ , compared with **HMX** and **RDX**.

| No. | $\rho$<br>(g/cm <sup>3</sup> ) | OB<br>(%) | Q<br>(cal/g) | D<br>(km/s) | P<br>(GPa) | $\Delta V_{\text{Triazol}}$<br>(cm <sup>3</sup> ) |
|-----|--------------------------------|-----------|--------------|-------------|------------|---------------------------------------------------|
| H1  | 1.76                           | -48.00    | 1035.24      | 7.45        | 24.22      | 265.28                                            |
| H2  | 1.78                           | -42.11    | 1162.47      | 7.82        | 26.92      | 305.27                                            |
| H3  | 1.90                           | -48.37    | 985.29       | 7.87        | 28.40      | 253.49                                            |
| H4  | 1.80                           | -48.70    | 1084.77      | 7.83        | 27.19      | 281.56                                            |
| H5  | 1.75                           | -67.29    | 1008.43      | 7.23        | 22.78      | 227.61                                            |
| H6  | 1.82                           | -57.14    | 1161.11      | 7.67        | 26.23      | 266.64                                            |
| H7  | 1.86                           | -78.20    | 988.83       | 7.27        | 23.87      | 189.19                                            |
| H8  | 1.95                           | -53.73    | 1059.90      | 7.88        | 28.90      | 252.44                                            |
| N1  | 1.88                           | -18.60    | 1515.62      | 8.79        | 35.17      | 442.25                                            |
| N2  | 1.88                           | -16.78    | 1556.51      | 8.92        | 36.15      | 453.21                                            |
| N3  | 1.91                           | -20.51    | 1427.25      | 8.84        | 35.92      | 417.16                                            |
| N4  | 1.87                           | -22.21    | 1462.09      | 8.81        | 35.23      | 425.28                                            |
| N5  | 1.86                           | -35.28    | 1412.71      | 8.46        | 32.42      | 388.18                                            |
| N6  | 1.88                           | -33.12    | 1487.60      | 8.55        | 33.26      | 396.55                                            |
| N7  | 1.86                           | -49.36    | 1354.56      | 8.11        | 29.69      | 337.01                                            |
| N8  | 1.90                           | -29.44    | 1426.78      | 8.51        | 33.15      | 392.41                                            |
| NA1 | 1.81                           | -22.22    | 1418.83      | 8.54        | 32.37      | 413.53                                            |
| NA2 | 1.85                           | -20.25    | 1481.08      | 8.81        | 34.94      | 430.44                                            |
| NA3 | 1.85                           | -23.76    | 1371.76      | 8.67        | 33.90      | 399.79                                            |
| NA4 | 1.82                           | -25.16    | 1406.77      | 8.65        | 33.44      | 408.18                                            |
| NA5 | 1.81                           | -37.09    | 1373.71      | 8.35        | 30.97      | 377.72                                            |
| NA6 | 1.83                           | -34.78    | 1427.56      | 8.43        | 31.89      | 381.36                                            |
| NA7 | 1.86                           | -49.72    | 1306.68      | 8.18        | 30.25      | 327.15                                            |
| NA8 | 1.90                           | -31.46    | 1366.71      | 8.55        | 33.50      | 376.24                                            |
| DN1 | 1.89                           | -12.83    | 1775.90      | 9.17        | 38.45      | 524.77                                            |
| DN2 | 1.87                           | -11.94    | 1775.13      | 9.15        | 38.02      | 523.66                                            |
| DN3 | 1.95                           | -14.40    | 1695.17      | 9.32        | 40.36      | 501.65                                            |
| DN4 | 1.90                           | -15.84    | 1724.99      | 9.22        | 38.92      | 508.29                                            |
| DN5 | 1.89                           | -24.74    | 1700.50      | 8.97        | 36.69      | 485.52                                            |



|     |      |        |         |      |       |                     |
|-----|------|--------|---------|------|-------|---------------------|
| DN6 | 1.88 | -24.67 | 1706.68 | 8.90 | 36.08 | 475.50              |
| DN7 | 1.85 | -36.36 | 1626.12 | 8.54 | 32.86 | 436.97              |
| DN8 | 1.88 | -21.72 | 1679.12 | 8.84 | 35.56 | 477.65              |
| TN1 | 1.89 | 3.43   | 1611.63 | 9.28 | 39.35 | 543.25              |
| TN2 | 1.89 | 3.24   | 1624.65 | 9.32 | 39.66 | 542.46              |
| TN3 | 1.92 | 1.66   | 1605.69 | 9.39 | 40.60 | 525.41              |
| TN4 | 1.91 | 0.00   | 1664.17 | 9.49 | 41.31 | 525.83              |
| TN5 | 1.89 | -6.67  | 1840.09 | 9.40 | 40.39 | 508.49              |
| TN6 | 1.88 | -8.79  | 1915.67 | 9.37 | 39.92 | 497.69              |
| TN7 | 1.87 | -18.05 | 2109.52 | 9.46 | 40.65 | 463.68              |
| TN8 | 1.92 | -5.99  | 1796.89 | 9.36 | 40.34 | 496.60              |
|     |      |        |         |      |       | 465.00 <sup>2</sup> |
| RDX | 1.80 | -21.62 | 1501    | 8.75 | 34.70 | 475.00 <sup>2</sup> |
|     |      |        |         |      |       | 480.00 <sup>2</sup> |
| HMX | 1.90 | -21.62 | 1498    | 9.10 | 39.30 | 450.00 <sup>2</sup> |

## 6. Sensitivity parameters

**Table S3.** 40 substituted 1,2,4-triazole derivatives, their predicted values of impact, electrostatic, and shock sensitivities(  $h_{50}$ ,  $E_{ES}$ ,  $P_{90\%TMD}$ ,  $P_{95\%TMD}$ ,  $P_{98\%TMD}$ ), compared with **TMBT**, **DNBF**.

| No. | $h_{50}$ (cm) | $E_{ES}$ (J) | $P_{90\%TMD}$ (MPa) | $P_{95\%TMD}$ (MPa) | $P_{98\%TMD}$ (MPa) |
|-----|---------------|--------------|---------------------|---------------------|---------------------|
| H1  | 47.61         | 13.72        | 2131.60             | 2692.20             | 2987.10             |
| H2  | 29.62         | 13.72        | 2131.60             | 2692.20             | 2987.10             |
| H3  | 51.10         | 16.01        | 2244.75             | 2816.15             | 3097.65             |
| H4  | 54.34         | 18.30        | 2357.90             | 2940.10             | 3208.20             |
| H5  | 128.30        | 17.57        | 2584.20             | 3188.00             | 3429.30             |
| H6  | 37.19         | 12.26        | 2584.20             | 3188.00             | 3429.30             |
| H7  | 122.40        | 16.11        | 3036.80             | 3683.80             | 3871.50             |
| H8  | 43.73         | 11.15        | 2357.90             | 2940.10             | 3208.20             |
| N1  | 92.37         | 9.07         | 4996.50             | 8532.70             | 11602.20            |
| N2  | 59.30         | 9.07         | 4996.50             | 8532.70             | 11602.20            |
| N3  | 94.17         | 10.59        | 5109.65             | 8656.65             | 11712.75            |
| N4  | 95.81         | 12.12        | 5222.80             | 8780.60             | 11823.30            |
| N5  | 194.75        | 11.39        | 5449.10             | 9028.50             | 12044.40            |
| N6  | 64.35         | 7.60         | 5449.10             | 9028.50             | 12044.40            |
| N7  | 175.23        | 9.92         | 5901.70             | 9524.30             | 12486.60            |
| N8  | 75.02         | 7.89         | 5222.80             | 8780.60             | 11823.30            |
| NA1 | 95.81         | 12.12        | 4591.40             | 8143.80             | 11407.10            |
| NA2 | 63.95         | 12.12        | 4591.40             | 8143.80             | 11407.10            |
| NA3 | 97.31         | 13.65        | 4704.55             | 8267.75             | 11517.65            |
| NA4 | 98.70         | 15.17        | 4817.70             | 8391.70             | 11628.20            |
| NA5 | 187.26        | 14.44        | 5044.00             | 8639.60             | 11849.30            |
| NA6 | 68.20         | 10.65        | 5044.00             | 8639.60             | 11849.30            |
| NA7 | 170.98        | 12.97        | 5496.60             | 9135.40             | 12291.50            |
| NA8 | 78.64         | 10.50        | 4817.70             | 8391.70             | 11628.20            |

|      |       |       |          |          |          |
|------|-------|-------|----------|----------|----------|
| DN1  | 43.11 | 9.27  | 8087.70  | 14621.10 | 20438.40 |
| DN2  | 33.17 | 9.27  | 8087.70  | 14621.10 | 20438.40 |
| DN3  | 45.01 | 10.19 | 8200.85  | 14745.05 | 20548.95 |
| DN4  | 46.83 | 11.11 | 8314.00  | 14869.00 | 20659.50 |
| DN5  | 74.77 | 10.37 | 8540.30  | 15116.90 | 20880.60 |
| DN6  | 37.68 | 7.81  | 8540.30  | 15116.90 | 20880.60 |
| DN7  | 77.46 | 8.91  | 8992.90  | 15612.70 | 21322.80 |
| DN8  | 41.58 | 8.37  | 8314.00  | 14869.00 | 20659.50 |
| TN1  | 20.51 | 11.65 | 10726.30 | 20213.70 | 28832.40 |
| TN2  | 17.28 | 11.65 | 10726.30 | 20213.70 | 28832.40 |
| TN3  | 21.73 | 12.30 | 10839.45 | 20337.65 | 28942.95 |
| TN4  | 22.95 | 12.96 | 10952.60 | 20461.60 | 29053.50 |
| TN5  | 32.71 | 12.22 | 11178.90 | 20709.50 | 29274.60 |
| TN6  | 20.44 | 10.18 | 11178.90 | 20709.50 | 29274.60 |
| TN7  | 36.52 | 10.76 | 11631.50 | 21205.30 | 29716.80 |
| TN8  | 21.88 | 10.82 | 10952.60 | 20461.60 | 29053.50 |
| TABT | --    | 17.71 | 7038.00  | 12192.00 | 16486.00 |
| DNBF | 12.00 | --    | --       | --       | --       |

---

## 7. References

1. J. S. P. Politzer; Murray, *Central European Journal of Energetic Materials*, 2011, 209-220.
2. M. K. Kamalvand, M. H.; Jafari, M., *Propellants, Explosives, Pyrotechnics*, 2015, **40**, 551-557.
